# Supplementary material for: Crystal structure of FabZ-ACP complex reveals a dynamic seesaw-like catalytic mechanism of dehydratase in fatty acid biosynthesis
Source: PubMed Central journal article supplement — Cell Res. 2016 Nov 22;26(12):1330–44. doi: 10.1038/cr.2016.136 (PMC5143422; doi:10.1038/cr.2016.136), 2016-11-22
Supplement: cr2016136x1.pdf [file cr2016136x1.pdf]

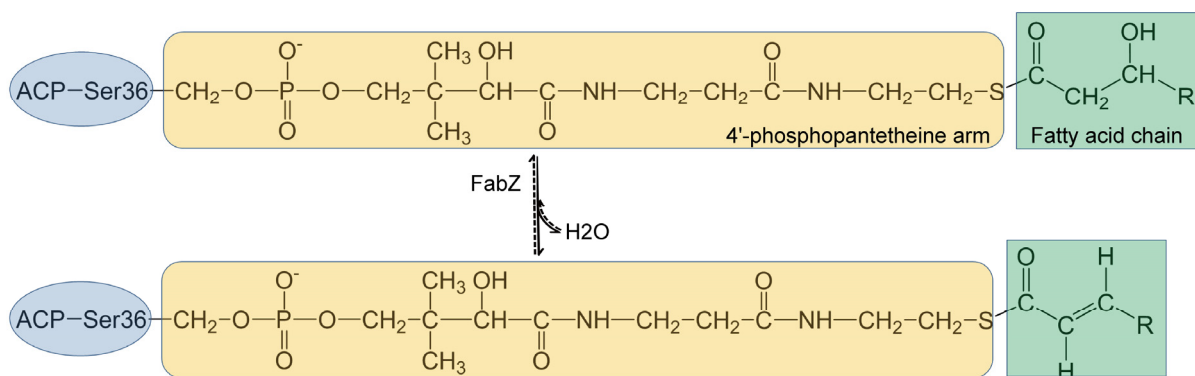

**Supplementary information, Figure S1** Schematic diagram of FabZ dehydratase catalytic mechanism. ACP protein, 4'-phosphopantetheine arm and fatty acid substrate are colored in light blue, yellow, and green respectively.
