# Supplementary material for: Crystal structure of FabZ-ACP complex reveals a dynamic seesaw-like catalytic mechanism of dehydratase in fatty acid biosynthesis
Source: PubMed Central journal article supplement — Cell Res. 2016 Nov 22;26(12):1330–44. doi: 10.1038/cr.2016.136 (PMC5143422; doi:10.1038/cr.2016.136), 2016-11-22
Supplement: cr2016136x4.pdf [file cr2016136x4.pdf]

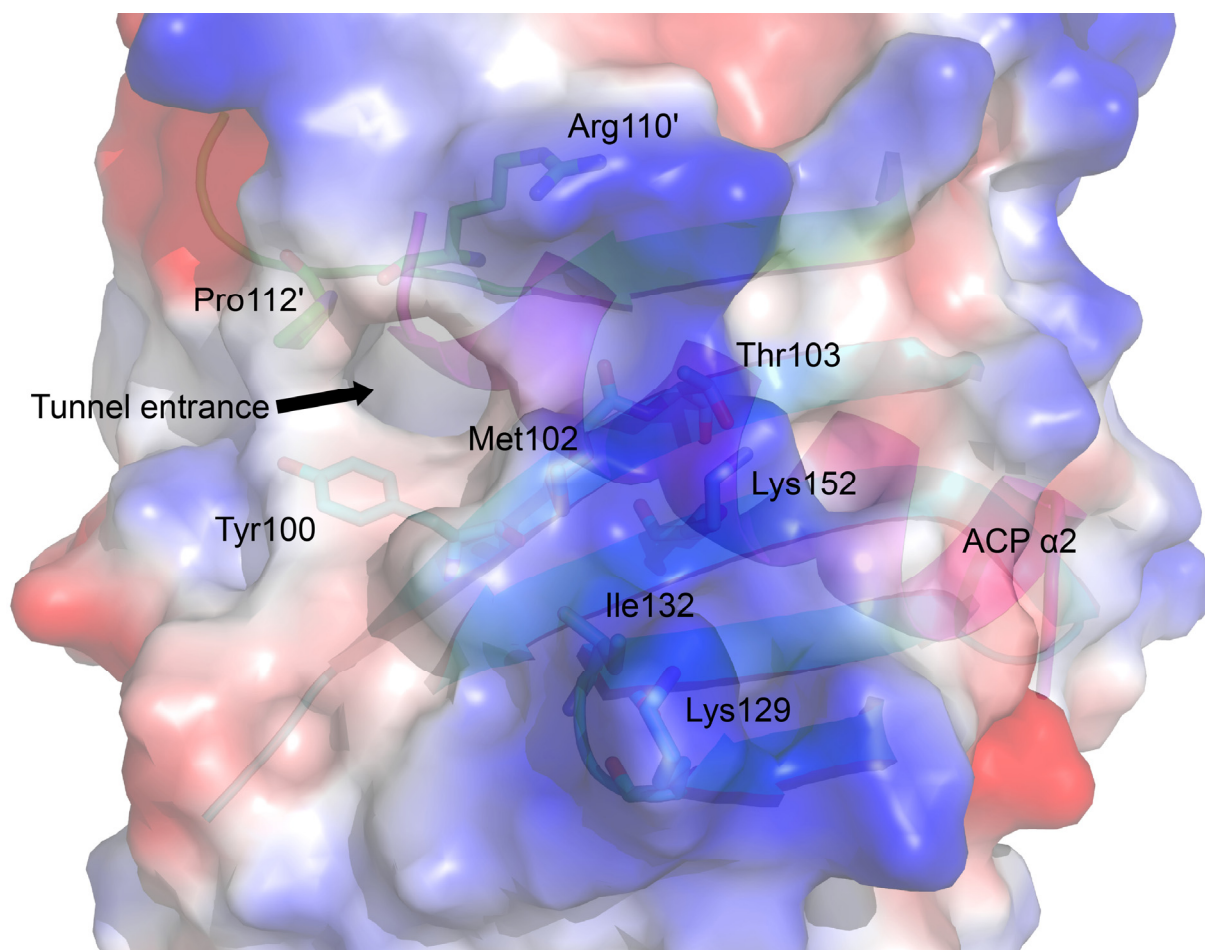

**Supplementary information, Figure S4** The electrostatic surface around the FabZ active tunnel entrance (black arrow). The extreme ranges of red (negative) and blue (positive) of the surfaces represent electrostatic potentials of  $-66.4$  e/kT to  $+66.4$  e/kT. The residues involved in the interactions between FabZ and ACP are shown as sticks and labeled. ACP  $\alpha 2$  helix is colored in magenta.
