# Supplementary material for: Crystal structure of FabZ-ACP complex reveals a dynamic seesaw-like catalytic mechanism of dehydratase in fatty acid biosynthesis
Source: PubMed Central journal article supplement — Cell Res. 2016 Nov 22;26(12):1330–44. doi: 10.1038/cr.2016.136 (PMC5143422; doi:10.1038/cr.2016.136), 2016-11-22
Supplement: cr2016136x5.pdf [file cr2016136x5.pdf]

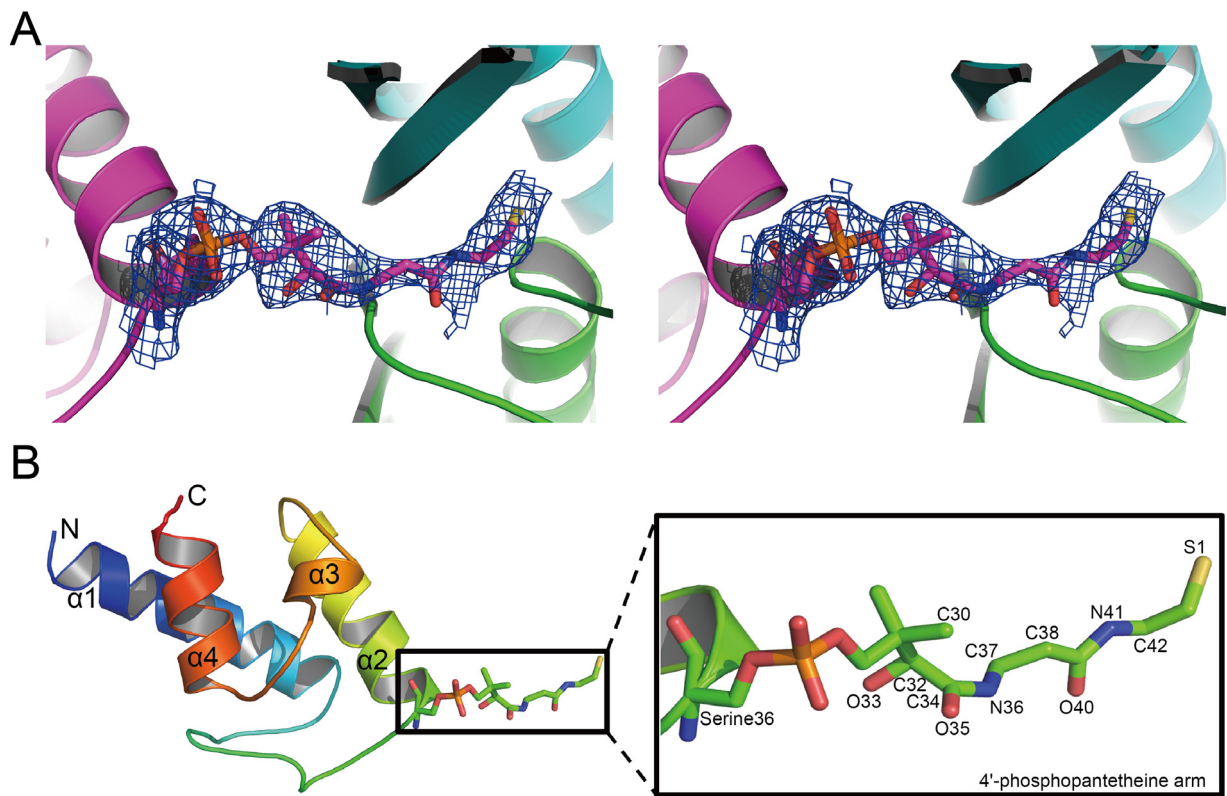

**Supplementary information, Figure S5** The structure of holo-ACP in FabZ-ACP complex. **(A)** Stereo view of the omit electron density map contoured at  $0.8 \sigma$  of the 4'-phosphopantetheine arm in FabZ-ACP complex. **(B)** The schematic diagram of holo-ACP. The atoms on the 4'-phosphopantetheine arm involved in the interactions are shown and labeled.
