# Supplementary material for: Crystal structure of FabZ-ACP complex reveals a dynamic seesaw-like catalytic mechanism of dehydratase in fatty acid biosynthesis
Source: PubMed Central journal article supplement — Cell Res. 2016 Nov 22;26(12):1330–44. doi: 10.1038/cr.2016.136 (PMC5143422; doi:10.1038/cr.2016.136), 2016-11-22
Supplement: cr2016136x7.pdf [file cr2016136x7.pdf]

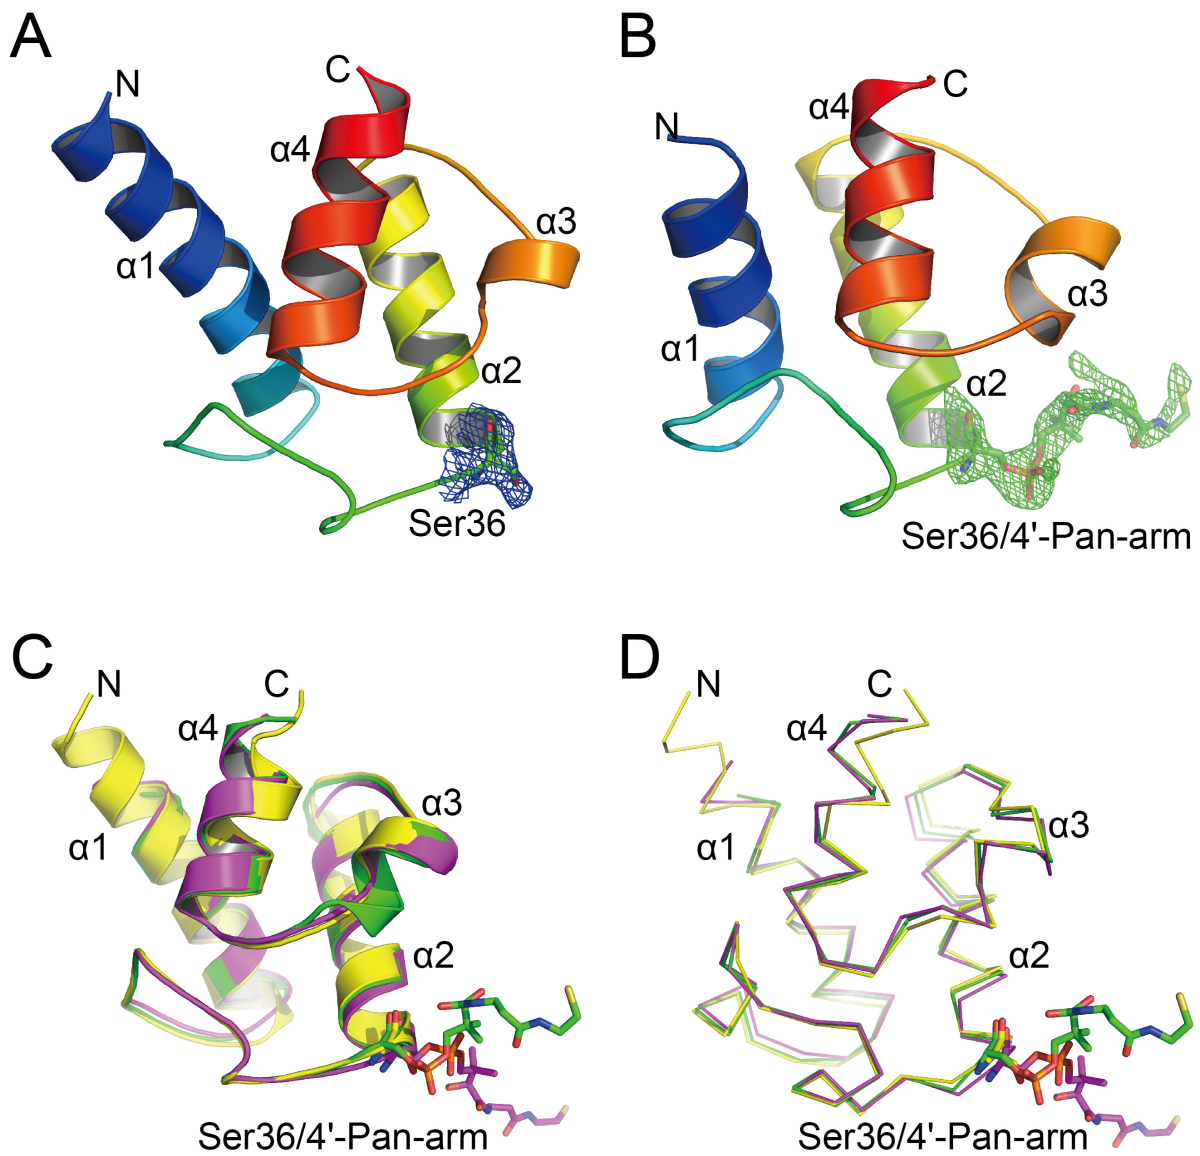

**Supplementary information, Figure S7** Overall crystal structures of apo-ACP and holo-ACP from *Helicobacter pylori*. **(A)** Overall crystal structure and 2fofc electron density map contoured at  $1.0 \sigma$  of the conserved Ser36 in apo-ACP structure. **(B)** Overall crystal structure and fofc omit electron density map contoured at  $2.0 \sigma$  of the 4'-phosphopantetheine arm in holo-ACP structure. **(C, D)** Schematic diagram of the superposition among apo-ACP, holo-ACP and holo-ACP from the complex.
