# Supplementary material for: Crystal structure of FabZ-ACP complex reveals a dynamic seesaw-like catalytic mechanism of dehydratase in fatty acid biosynthesis
Source: PubMed Central journal article supplement — Cell Res. 2016 Nov 22;26(12):1330–44. doi: 10.1038/cr.2016.136 (PMC5143422; doi:10.1038/cr.2016.136), 2016-11-22
Supplement: cr2016136x9.pdf [file cr2016136x9.pdf]

A

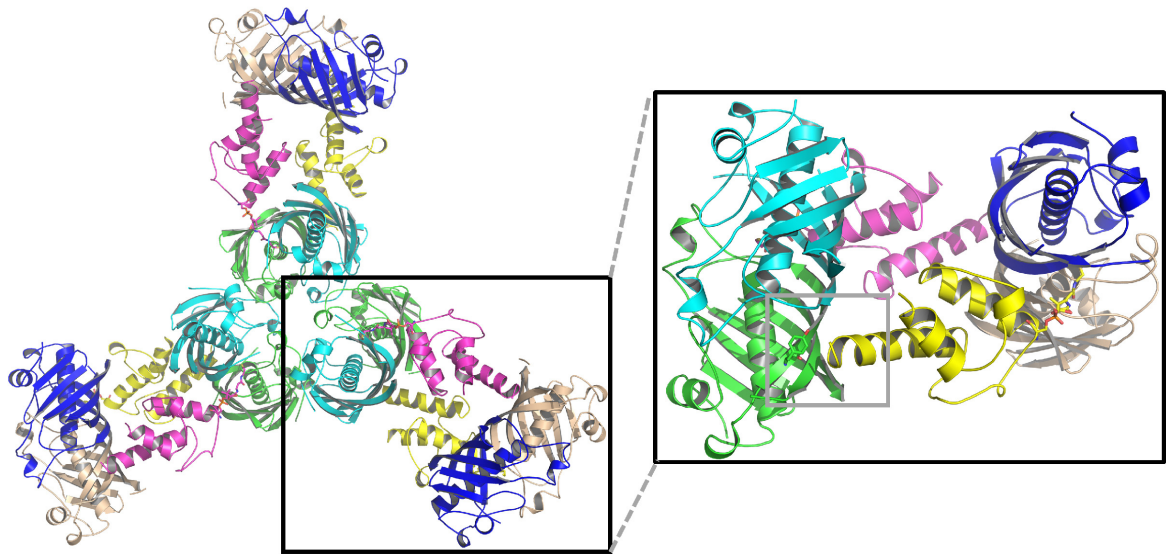

B

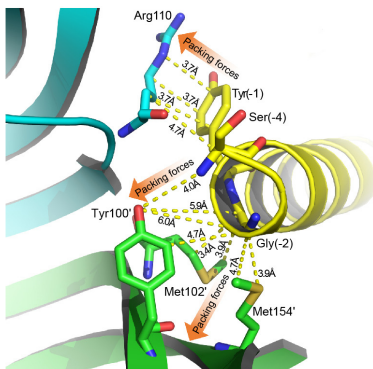

C

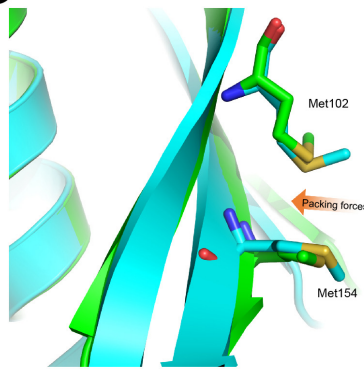

D

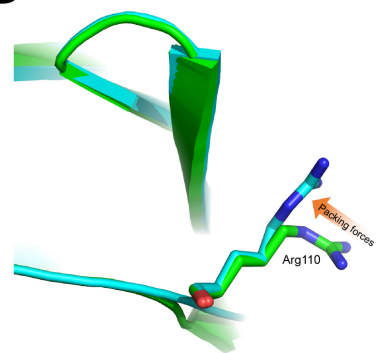

E

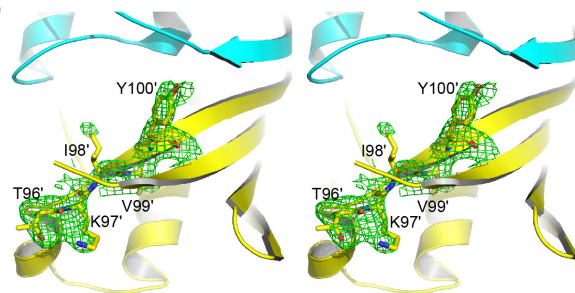

F

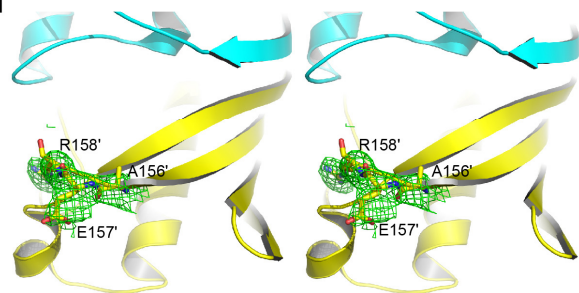

**Supplementary information, Figure S9** The crystallographic packing of FabZ with N-terminus of holo-ACP from neighbor FabZ-ACP complex. **(A)** The interactions involved in the packing. FabZ hexamer (dimer A/B) and holo-ACP within the complex are colored in green, cyan, and magenta, respectively. FabZ dimer (A/B) and holo-ACP from neighbor FabZ hexamer-ACP

complex are colored in wheat, blue and yellow, respectively. The residues involved in the packing interactions are shown as sticks and labeled. Y-1, G-2 and S-4 refer to the extra residues added to the N-terminus of holo-ACP from pET32a expression vector after enterokinase protease cleavage. **(B)** The Stereo view of fofc omit electron density of FabZ residue 96'-100' in monomer A at 2.0  $\sigma$ . **(C)** The Stereo view of fofc omit electron density of FabZ residue 156'-158' in monomer A at 2.0  $\sigma$ . Due to the flexibility of residues 96'-97' (long fatty acid chain exit II, disordered in any other published FabZ structures) and 156'-158' (C-terminus, moving region within the beta-sheet layer), the density maps are only acceptable.
