# Supplementary material for: Crystal structure of FabZ-ACP complex reveals a dynamic seesaw-like catalytic mechanism of dehydratase in fatty acid biosynthesis
Source: PubMed Central journal article supplement — Cell Res. 2016 Nov 22;26(12):1330–44. doi: 10.1038/cr.2016.136 (PMC5143422; doi:10.1038/cr.2016.136), 2016-11-22
Supplement: cr2016136x10.pdf [file cr2016136x10.pdf]

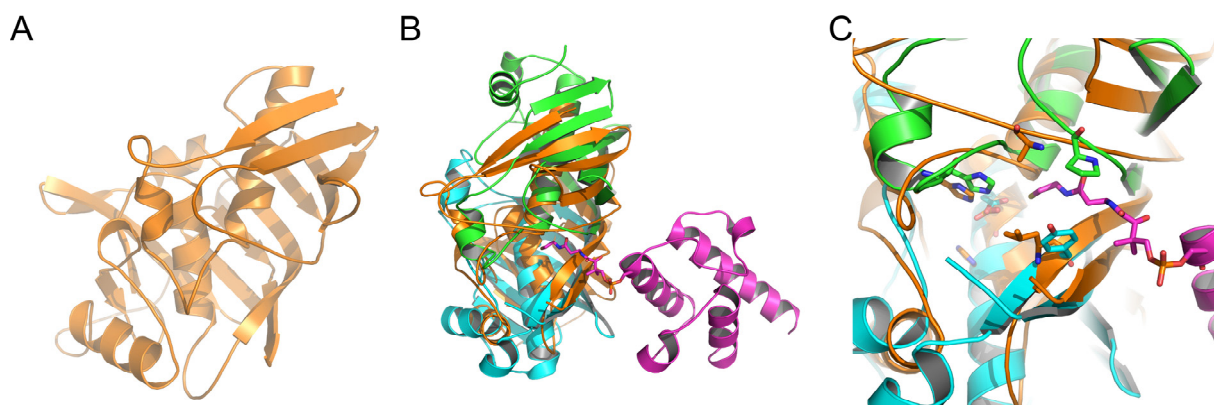

**Supplementary information, Figure S10** Superposition of FabZ-ACP complex with the dehydratase module of *Sus scrofa*. FAS. **(A)** Overall crystal structure of dehydratase module of mFAS from *Sus scrofa* (pdb code: 2vz8). The structure is colored in orange. **(B)** Superposition of FabZ-ACP with the dehydratase module. **(C)** Active tunnel entrance area of FabZ-ACP and the dehydratase module. Gatekeeper residue (Leu1050 in the dehydratase module, Tyr100 in FabZ) are shown in sticks.
