# Supplementary material for: Crystal structure of FabZ-ACP complex reveals a dynamic seesaw-like catalytic mechanism of dehydratase in fatty acid biosynthesis
Source: PubMed Central journal article supplement — Cell Res. 2016 Nov 22;26(12):1330–44. doi: 10.1038/cr.2016.136 (PMC5143422; doi:10.1038/cr.2016.136), 2016-11-22
Supplement: cr2016136x11.pdf [file cr2016136x11.pdf]

**Supplementary information, Table S1** Data collection and refinement statistics.

|                                                     | FabZ-ACP                  | apo-ACP                | holo-ACP                  |
|-----------------------------------------------------|---------------------------|------------------------|---------------------------|
| <b>Data collection</b>                              |                           |                        |                           |
| Space group                                         | P23                       | P3 <sub>1</sub>        | P3 <sub>1</sub>           |
| Cell dimensions                                     |                           |                        |                           |
| <i>a</i> , <i>b</i> , <i>c</i> (Å)                  | 127.705, 127.705, 127.705 | 49.596, 49.596, 72.949 | 50.3438, 50.3438, 73.2997 |
| $\alpha$ , $\beta$ , $\gamma$ (°)                   | 90.00,90.00,90.00         | 90.00, 90.00, 120.00   | 90.00, 90.00, 120.00      |
| Wavelength (Å)                                      | 1                         | 1                      | 1.5418                    |
| Resolution (Å)*                                     | 31.9-2.55(2.64-2.55)      | 15-2.60(2.69-2.60)     | 43.6-2.50(2.59-2.50)      |
| <i>R</i> <sub>merge</sub> (%)                       | 4.8(38.1)                 | 11.5(61.3)             | 8.7 (27)                  |
| <i>I</i> / $\sigma$ <i>I</i>                        | 49.5(5.2)                 | 8.5(1.4)               | 6.6 (2.3)                 |
| Completeness (%)                                    | 99.7(99.5)                | 99.4(98.3)             | 98.5(97.8)                |
| Redundancy                                          | 10.0(8.9)                 | 2.4(2.2)               | 3.0(2.0)                  |
| <b>Refinement</b>                                   |                           |                        |                           |
| Resolution (Å)                                      | 15-2.55                   | 15-2.6                 | 15- 2.5                   |
| No.reflections                                      | 22941                     | 6091                   | 6736                      |
| <i>R</i> <sub>work</sub> / <i>R</i> <sub>free</sub> | 0.194/0.231               | 0.241/0.286            | 0.218/0.252               |
| No.atoms                                            |                           |                        |                           |
| Protein                                             | 3070                      | 1239                   | 1782                      |
| Water                                               | 72                        | 41                     | 20                        |
| Ligand/ion                                          | 13                        | N/A                    | N/A                       |
| <b>B-factors</b>                                    |                           |                        |                           |
| Protein                                             | 65.341                    | 37.135                 | 35.409                    |
| Water                                               | 53.596                    | 27.707                 | 30.601                    |
| Ligand/ion                                          | 80.625                    | N/A                    | N/A                       |
| <b>R.m.s deviations</b>                             |                           |                        |                           |
| Bond lengths (Å)                                    | 0.012                     | 0.012                  | 0.013                     |
| Bond angles (°)                                     | 1.4                       | 1.3                    | 1.4                       |

\*Highest-resolution shell is shown in parentheses.
