# Supplementary material for: Crystal structure of FabZ-ACP complex reveals a dynamic seesaw-like catalytic mechanism of dehydratase in fatty acid biosynthesis
Source: PubMed Central journal article supplement — Cell Res. 2016 Nov 22;26(12):1330–44. doi: 10.1038/cr.2016.136 (PMC5143422; doi:10.1038/cr.2016.136), 2016-11-22
Supplement: cr2016136x12.pdf [file cr2016136x12.pdf]

**Supplementary information, Table S2** Interactions between FabZ and holo-ACP.

| holo-ACP   |                 | FabZ            |         |       | Distance | Interaction type        |
|------------|-----------------|-----------------|---------|-------|----------|-------------------------|
| Residue    | Atom            | Atom            | Residue | Chain | (Å)      |                         |
| Asp35      | O <sup>δ1</sup> | N <sup>η1</sup> | Arg110  | A     | 2.84     | H-bond interaction      |
| Asp38      | O <sup>δ2</sup> | N <sup>η1</sup> | Arg110  | A     | 3.01     | H-bond interaction      |
| Asp38      | O <sup>δ2</sup> | N <sup>η2</sup> | Arg110  | A     | 3.14     | H-bond interaction      |
| Glu41      | C <sup>δ</sup>  | C <sup>γ2</sup> | Thr103  | B     | 3.87     | Hydrophobic interaction |
| Glu41      | O <sup>ε1</sup> | N <sup>ζ</sup>  | Lys152  | B     | 2.86     | H-bond interaction      |
| Glu41      | C <sup>γ</sup>  | C <sup>ε</sup>  | Lys152  | B     | 3.83     | Hydrophobic interaction |
| Met44      | S <sup>δ</sup>  | C <sup>δ1</sup> | Ile132  | B     | 3.62     | Hydrophobic interaction |
| Glu47      | O <sup>ε2</sup> | N <sup>ζ</sup>  | Lys129  | B     | 2.74     | H-bond interaction      |
| Glu47      | C <sup>δ</sup>  | C <sup>ε</sup>  | Lys129  | B     | 3.86     | Hydrophobic interaction |
| 4'-Pan-arm | C <sup>42</sup> | C <sup>α</sup>  | Gly67   | A     | 3.78     | Hydrophobic interaction |
| 4'-Pan-arm | C <sup>39</sup> | C <sup>β</sup>  | Phe109  | A     | 3.61     | Hydrophobic interaction |
| 4'-Pan-arm | C <sup>37</sup> | C <sup>β</sup>  | Phe109  | A     | 3.64     | Hydrophobic interaction |
| 4'-Pan-arm | C <sup>37</sup> | C               | Phe109  | A     | 3.31     | Hydrophobic interaction |
| 4'-Pan-arm | N <sup>36</sup> | O               | Arg110  | A     | 3.26     | H-bond interaction      |
| 4'-Pan-arm | O <sup>33</sup> | O               | Arg110  | A     | 3.07     | H-bond interaction      |
| 4'-Pan-arm | C <sup>37</sup> | C               | Arg110  | A     | 3.81     | Hydrophobic interaction |
| 4'-Pan-arm | C <sup>34</sup> | C               | Arg110  | A     | 3.67     | Hydrophobic interaction |
| 4'-Pan-arm | C <sup>38</sup> | C <sup>ε2</sup> | Tyr100  | B     | 3.85     | Hydrophobic interaction |
| 4'-Pan-arm | C <sup>38</sup> | C <sup>δ2</sup> | Tyr100  | B     | 3.48     | Hydrophobic interaction |
| 4'-Pan-arm | S <sup>1</sup>  | C <sup>δ1</sup> | Phe101  | B     | 3.88     | Hydrophobic interaction |
| 4'-Pan-arm | S <sup>1</sup>  | C <sup>β</sup>  | Phe101  | B     | 3.59     | Hydrophobic interaction |
| 4'-Pan-arm | C <sup>30</sup> | C <sup>ε</sup>  | Met102  | B     | 3.75     | Hydrophobic interaction |
